1 **Title:** Natural *Wolbachia* infections are common in the major malaria vectors in  
2 Central Africa

3

4 **Running title:** *Wolbachia* diversity in African *Anopheles*

5

6 **Authors**

7 Diego Ayala<sup>1,2,\*</sup>, Ousman Akone-Ella<sup>2</sup>, Nil Rahola<sup>1,2</sup>, Pierre Kengne<sup>1</sup>, Marc F.  
8 Ngangue<sup>2,3</sup>, Fabrice Mezeme<sup>2</sup>, Boris K. Makanga<sup>2</sup>, Carlo Costantini<sup>1</sup>, Frédéric  
9 Simard<sup>1</sup>, Franck Prugnolle<sup>1</sup>, Benjamin Roche<sup>1,4</sup>, Olivier Duron<sup>1</sup> & Christophe Paupy<sup>1</sup>.

10

11 **Affiliations**

12 <sup>1</sup> MIVEGEC, IRD, CNRS, Univ. Montpellier, Montpellier, France.

13 <sup>2</sup> CIRMF, Franceville, Gabon.

14 <sup>3</sup> ANPN, Libreville, Gabon

15 <sup>4</sup> UMMISCO, IRD, Montpellier, France.

16

17 **\* Corresponding author:**

18 Diego Ayala, MIVEGEC, IRD, CNRS, Univ. Montpellier, 911 av Agropolis, BP  
19 64501, 34394 Montpellier, France; phone: +33(0)4 67 41 61 47; email:  
20 diego.ayala@ird.fr

21

22

23 **Abstract**

24 During the last decade, the endosymbiont bacterium *Wolbachia* has emerged as a  
25 biological tool for vector disease control. However, during long time, *Wolbachia* was  
26 thought to be absent in natural populations of *Anopheles*. The recent discovery that  
27 species within the *Anopheles gambiae* complex hosts *Wolbachia* in natural conditions  
28 has opened new opportunities for malaria control research in Africa. Here, we  
29 investigated *Wolbachia* infectious status in 25 African *Anopheles* species in Gabon  
30 (Central Africa). Our results revealed the presence of *Wolbachia* in 16 of these  
31 species, including the major malaria vectors in this area. The infection prevalence  
32 varies greatly among species, confirming that sample size is a key factor to detect the  
33 infection. Moreover, our sequencing and phylogenetic analyses showed the important  
34 diversity of *Wolbachia* strains that infect *Anopheles*. Co-evolutionary analysis  
35 unveiled patterns of *Wolbachia* transmission within *Anopheles* species, suggesting  
36 that past independent acquisition events were followed by co-cladogenesis. The large  
37 diversity of *Wolbachia* strains that infect natural populations of *Anopheles* offers a  
38 promising opportunity to select suitable phenotypes for suppressing *Plasmodium*  
39 transmission and/or manipulating *Anopheles* reproduction, which in turn could be  
40 used to reduce the malaria burden in Africa.

41

42 **Key-words:** *Anopheles*, *Wolbachia*, diversity, co-evolution, disease control.

43

## 44 **Introduction**

45 Malaria still affects millions of people and causes thousands of victims worldwide,  
46 and sub-Saharan Africa pays the highest tribute <sup>1</sup>. Currently, vector-control measures  
47 (e.g., insecticide-treated bed nets or indoor residual spray) are the largest contributors  
48 to malaria eradication <sup>2</sup>. Indeed, if these interventions are maintained or increased,  
49 malaria burden should be drastically reduced in Africa before 2030 <sup>3</sup>. These  
50 predictions are based on the constant effectiveness of these methods. However, the  
51 spread of insecticide resistance <sup>4</sup> and vector behavioural changes related to the  
52 massive use of bed nets <sup>5</sup> will challenge malaria eradication in the coming decades.  
53 Therefore, it is indispensable to develop alternative and environmentally friendly  
54 control strategies for the millennium development goal of malaria eradication <sup>6</sup>.

55

56 Several methods have been proposed to accompany or replace the use of synthetic  
57 insecticides <sup>7</sup>. Among them, the use of the maternally inherited *Wolbachia* bacteria  
58 ( $\alpha$ -proteobacteria, Anaplasmataceae family) has emerged as a promising alternative  
59 biological tool for fighting malaria and other vector-borne diseases <sup>7-11</sup>. This  
60 bacterium exhibits a large spectrum of interactions with its hosts: from mutualism and  
61 commensalism to parasitism <sup>12</sup>. Moreover, *Wolbachia* has proved its ability to invade  
62 mosquito populations and/or to prevent pathogen infections in some of the most  
63 important mosquito vectors <sup>11</sup>. Indeed, artificial *Wolbachia* infection has been  
64 successfully used to suppress dengue transmission in natural populations of *Aedes*  
65 *aegypti* <sup>13,14</sup>. Similarly, artificial infection of *Anopheles* (the vector of human malaria)  
66 with *Wolbachia* strains has a negative impact on the transmission of *Plasmodium*  
67 parasites <sup>15-17</sup>, providing a relevant alternative for malaria control. However, during  
68 long time, *Wolbachia* was thought to be absent in natural populations of *Anopheles* <sup>18</sup>.

69 Yet, since 2014, *An. gambiae*, *An. coluzzii* and *An. arabiensis* (three major malaria  
70 vectors) populations from Burkina Faso and Mali (West Africa) were found naturally  
71 infected by *Wolbachia*<sup>19-21</sup>. Noteworthy, they showed a negative correlation between  
72 *Wolbachia* infection and *Plasmodium* development<sup>20,21</sup>. These findings support the  
73 development of novel vector control strategies based on *Wolbachia*-*Anopheles*  
74 interactions. However, although *Wolbachia* naturally infects 40% - 60% of arthropods  
75<sup>22,23</sup>, infection was delimited to *Anopheles* species within the *gambiae* complex.  
76 Indeed, during the last decade, many other malaria mosquito species worldwide  
77 (n=38) were unsuccessfully screened for *Wolbachia* infection<sup>9,18,24</sup>. Therefore, the  
78 recent discovery of *Wolbachia* infecting species within the *gambiae* complex across  
79 West Africa couple with the development of new molecular tools, make necessary to  
80 screen other natural occurring *Anopheles* populations for the presence of the  
81 bacterium.

82

83 In this study, we investigated the presence of *Wolbachia* in 25 *Anopheles* species in  
84 Gabon, Central Africa. We sampled mosquitoes across the country and in a variety of  
85 ecological settings, from deep rainforest to urban habitats. By using a molecular  
86 approach, we confirmed *Wolbachia* presence in 16 species, including all the major  
87 malaria vectors in Central Africa (*An. gambiae*, *An. coluzzii*, *An. funestus*, *Anopheles*  
88 *nili* and *Anopheles moucheti*). The prevalence of *Wolbachia* infection was particularly  
89 high in *An. nili* and *An. moucheti*. Phylogenetic analysis revealed that all the infected  
90 mosquito species hosted *Wolbachia* bacteria belonging to the supergroups A or B that  
91 exhibit high genetic diversity. Finally, we explored the co-evolution between  
92 *Wolbachia* and *Anopheles*. The results have direct implications for the development of

93 new and environmentally friendly vector control strategies and open new directions  
94 for research on pathogen transmission and reproductive manipulation.

95

## 96 **Results**

### 97 ***Wolbachia naturally infects a large number of Anopheles species from Gabon.***

98 In this study, we screened 648 mosquitoes from eight sites in Gabon (Fig 1, Table 1,  
99 Table S1). Based on morphological traits<sup>25</sup> and molecular analysis<sup>26-30</sup>, we identified  
100 25 *Anopheles* species (Text S1), although further molecular studies may be conducted  
101 to confirm the species status of the new taxa. Our sample included all the species in  
102 which the presence of *Wolbachia* was previously investigated in Africa (*An. gambiae*,  
103 *An. coluzzii*, *An. funestus* and *An. coustani*), with the exception of *An. arabiensis* that  
104 is absent in Gabon (Table 1). By PCR-amplification of a *16S* rRNA fragment<sup>20</sup>, we  
105 found 70 *Wolbachia*-positive specimens that belonged to 16 different *Anopheles*  
106 species, distributed throughout the country (Fig 1, Table S1). With few exceptions,  
107 *Wolbachia* infection rate was lower than 15% in most species (n=11), as observed in  
108 other arthropods<sup>22,23</sup>. The exceptions concerned the *An. moucheti* complex, *An.*  
109 *jebudensis* and *An. nili*, in which more than 50% of sampled mosquitoes were infected  
110 (Table 1). None of these species was previously screened for *Wolbachia* infection. We  
111 also found an important correlation between the number of screened and the number  
112 of infected individuals ( $r^2=0.36$ , Table S1), confirming that the screening effort is the  
113 critical factor for *Wolbachia* detection in *Anopheles*. Indeed, we estimated that a  
114 sample size of 60 individuals per species was needed to quantify correctly a  
115 prevalence lower than 15%, with a probability of 95% (Fig 2). As our sample size  
116 mostly varied from 1 to 58 individuals for each species, with few exceptions in which

117 sample size was lower than five individuals, the probability of a correct estimation of  
118 *Wolbachia* prevalence ranged between 68% and 93% (Fig 2).

119

120 ***Wolbachia* is maternally inherited in *An. moucheti*.**

121 Although *Wolbachia* is mainly maternally transmitted<sup>12</sup>, horizontal transmission may  
122 occasionally occur in natural conditions<sup>31-33</sup>. To confirm the vertical transmission in  
123 the infected mosquito species, we focused on *An. moucheti* for logistic reasons (i.e.,  
124 highest *Wolbachia* prevalence and ease of sampling). Although *An. moucheti* has  
125 never reproduced in insectary conditions to date, we obtained eggs from six  
126 *Wolbachia*-infected females that were placed individually in 1.5ml Eppendorf tubes  
127 for egg laying. In total, we analysed the infectious status of 79 progeny by PCR  
128 amplification of the same *16S* rRNA fragment<sup>20</sup> (Table S2) and found that 70 were  
129 infected, with an average vertical transmission frequency of 97.54% (range: 90% -  
130 100%).

131

132 **Naturally occurring *Wolbachia* strains in *Anopheles* reveal high genetic diversity.**

133 By sequence analysis of the *16S* rRNA fragment PCR-amplified from each *Anopheles*  
134 sample (Table 1), we could assign the *Wolbachia* strains to three pre-existing  
135 supergroups: A (n=5), B (n=64) and C (n=1) (Fig 3). Specifically, we detected  
136 supergroup B *Wolbachia* in 64 mosquitoes belonging to all 16 infected *Anopheles*  
137 species. We found supergroup A *Wolbachia* in five individuals from four species (*An.*  
138 *funestus*, *An. coluzzii*, *An. vinckei* and *An. carnevalei*), thus providing examples of  
139 superinfection, as previously observed in *Ae. albopictus*<sup>34</sup> (Fig 3). Noteworthy, none  
140 of the mosquitoes examined was co-infected by *Wolbachia* strains belonging, for  
141 instance, to the supergroups A and B. Moreover, we confirmed that *Wolbachia*

142 previously identified in *An. gambiae s.l.* from Burkina Faso and Mali are included in  
143 the supergroups A and B <sup>19,21</sup>. Finally, we found that one *An. coustani* individual was  
144 infected by a *Wolbachia* strain from the supergroup C that is strictly known to infect  
145 filarial worms. We thus investigated the presence of filarial nematode DNA in the  
146 mosquito by PCR amplification and sequencing of a fragment of the *COI* filarial gene  
147 <sup>35</sup>, followed by phylogenetic analysis with RAxML. Our results confirmed the  
148 presence of *Dirofilaria immitis* in this specimen (Fig. S1). This canine filarial parasite  
149 hosts *Wolbachia* and is transmitted by many mosquitoes, including *Anopheles* <sup>36</sup>.  
150 Therefore, it is not surprising to find an *An. coustani* specimen infected by this filarial  
151 nematode. This specimen was excluded from further investigations.

152

153 To expand our knowledge on the *Wolbachia* strains that infect natural *Anopheles*  
154 populations, we PCR-amplified, sequenced and analysed the *16S* rRNA fragment and  
155 also fragments from three other conserved *Wolbachia* genes (*coxA*, *fbpA* and *ftsZ*) that  
156 are commonly used for strain typing and evolutionary studies <sup>37</sup> (Fig 3). We used a  
157 new nested PCR protocol (see *Methods*) for samples that could not be genotyped  
158 using the classical Multi Locus Sequence Typing (MLST) primers (Table S1). Our  
159 phylogenetic analyses confirm the *16S* results, assigning most of the species to  
160 supergroups A and B. Few exceptions (Fig 3, gene *coxA*) showed some incongruence  
161 with regard to *16S*. They suggest signals of recent recombination between the  
162 supergroups A and B, as it was previously demonstrated <sup>37</sup>. Detailed sequence  
163 analysis revealed that mosquito species belonging to the same group or complex (i.e.,  
164 *An. moucheti* and *An. gambiae*) displayed a common *Wolbachia* haplotype (Fig. 3 and  
165 Fig. 4). Conversely, some species with lower prevalence displayed a variety of  
166 haplotypes (i.e., *An. coluzzii*, *An. marshallii*, *An. vinckei* or *An. funestus*). The case of

167 *An. vinckei* was particularly interesting because the three infected specimens  
168 displayed different haplotypes for the analysed *Wolbachia* genes. Moreover, one  
169 specimen (*An. vinckei* M002, Fig 3) revealed a completely different *Wolbachia* strain.  
170 Overall, none of the *Wolbachia* strains discovered in this study matched previously  
171 annotated *Wolbachia* strains or the strain that infects *An. gambiae* in Burkina Faso  
172 and Mali <sup>19,21</sup> (Fig. 3 and Fig. 4). Within the supergroup B, we could easily  
173 distinguish at least two strains. The strain infecting *An. moucheti* (*wANMO*) was  
174 similar to several *Anopheles* species, such as *An. gambiae* or *An. marshallii*, while the  
175 strain infecting *An. nili* (*wANNI*) was more closely related to those found in other  
176 mosquitoes species like *Ae. albopictus* or *Cx. quinquefasciatus* (Fig. 3 and Fig. 4).  
177 Conversely, the other haplotypes were associated with one specific host.

178

### 179 ***Wolbachia* independently evolves in malaria-transmitting mosquitoes.**

180 As *Wolbachia* is mainly a maternally inherited bacterium, the host mitochondrial  
181 DNA (mtDNA) is a suitable marker to study its evolutionary history in *Anopheles* <sup>38</sup>.  
182 Analysis of *COII* sequences from 176 specimens belonging to the 25 *Anopheles*  
183 species collected in Gabon provided the most exhaustive phylogenetic tree of  
184 *Anopheles* in Central Africa (Fig 4). Concerning *Wolbachia* infection, we observed  
185 the independent acquisition and loss across the different *Anopheles* species clades.  
186 Moreover, the genetic distances of *Anopheles* species and their *Wolbachia*  
187 counterparts were not correlated (Mantel test,  $p > 0.05$ ) (Fig. S2). Despite, mosquitoes  
188 from the same complex, and therefore genetically very close, shared similar  
189 *Wolbachia* haplotypes (Fig 4 and Fig. S2). Finally, we investigated how *Wolbachia*  
190 evolves within each *Anopheles* species <sup>39</sup>. Our results revealed that *Wolbachia*-



191 infected and non-infected mosquitoes shared the same mtDNA haplotype (Fig 3),  
192 indicating that infection status and host haplotypes are not associated.

193

## 194 **Discussion**

195 The present study provides three key conclusions. First, the genus *Anopheles* includes  
196 a large number of species that are naturally infected by *Wolbachia* (16/25), with high  
197 infection prevalence among major malaria vectors. Second, *Anopheles*-infecting  
198 *Wolbachia* bacteria show high genetic diversity, with similar haplotypes detected in  
199 different *Anopheles* species. Third, the independent evolution of *Wolbachia* and  
200 *Anopheles* might be interpreted as multiple acquisition events with horizontal  
201 transmission. The large diversity of *Wolbachia* strains that infect many natural  
202 *Anopheles* populations opens new perspectives about their use for reducing pathogen  
203 transmission and/or for reproductive manipulation in *Anopheles* with the aim of  
204 decreasing malaria burden in Africa.

205

206 For long time, the scientific community has investigated how to use *Wolbachia* for  
207 fighting vector-borne diseases<sup>7-9,11</sup>. In arthropods, *Wolbachia* is broadly spread,  
208 including among *Culex* and *Aedes* mosquitoes. At the genus *Anopheles*, the infection  
209 was delimited to species within the gambiae complex<sup>19,21</sup>. Several hypotheses can be  
210 put forward to explain this underrepresentation. First, low infection prevalence or  
211 local variations could have hindered the discovery of *Wolbachia* infections. In our  
212 study, most *Anopheles* species exhibited a prevalence lower than 15% (Table 1). This  
213 pattern is common in many other arthropods<sup>22,23</sup>, and it is usually associated with a  
214 weak manipulation of the host reproduction and/or imperfect maternal transmission<sup>40</sup>.  
215 Our statistical analysis confirmed that important sampling and screening efforts are

216 required to detect *Wolbachia* in species with low infection rates, such as *Anopheles*  
217 (Fig 2). In general, our sampling effort was higher than in previous studies ( $n < 30$ )  
218 <sup>9,24</sup>, which could explain why we found more species infected. Moreover, local  
219 frequency variations among populations could also hinder the detection of *Wolbachia*  
220 infections <sup>41</sup>. For instance, we sampled *An. coluzzii* in three different sites, but we  
221 only found *Wolbachia*-infected mosquitoes at La Lopé (Fig 1, Table S1). Therefore,  
222 sampling in different localities at seasons would improve detection rates. Second,  
223 low-density *Wolbachia* infections may not be detected in *Anopheles* by the routinely  
224 used molecular tools, as previously reported for other arthropods <sup>42,43</sup> and recently in  
225 *Anopheles gambiae* <sup>21</sup>. Our results indicate that conventional amplification  
226 (conventional PCR) analysis allowed detecting *Wolbachia* infection only in 6 of 16  
227 species (*An. moucheti*, *An m. nigeriensis*, *An. "GAB-3"*, *An nili*, *An. jebudensis* and  
228 *An. vinckei*), presumably with high *Wolbachia* density. Moreover, some *Anopheles*  
229 species with high *Wolbachia* infection rates, such as *An. moucheti* or *An. nili*, were  
230 never screened before this study <sup>9</sup>.

231

232 Unexpectedly, our work revealed that *Anopheles* species are infected by different  
233 *Wolbachia* species. Although three previous studies reported *Wolbachia* infection in  
234 the *An. gambiae* germline <sup>19-21</sup>, we do not know whether *Wolbachia* naturally invade  
235 and is maternally inherited in the infected mosquito species from Gabon. Indeed,  
236 horizontal gene transfer (resulting in the insertion of *Wolbachia* genes within the  
237 mosquito genome), or parasitism (e.g., by filarial nematodes) could explain the  
238 presence of *Wolbachia* in an organism without vertical transmission. However, the  
239 *Wolbachia* sequences we identified were genetically close to those found in other  
240 Diptera and we did not observe any signal of extensive divergence, which would be

241 expected in the case of horizontal gene transfer <sup>44,45</sup> (Figs 3 and 4). Alternatively,  
242 mosquitoes could have been parasitized by *Wolbachia*-hosting nematodes <sup>46,47</sup> or  
243 mites <sup>48</sup>. However, these *Wolbachia* strains belong to other, easily distinguishable  
244 supergroups (Fig 3 and Fig. S1). Moreover, the analysis of *An. moucheti* F1 confirm,  
245 at least in this species, that no other biological *Wolbachia* contamination were present  
246 in our analysis. In conclusion, we found evidences to suggest that *Wolbachia* is  
247 naturally present and maternally inherited in the natural populations of *Anopheles*  
248 species of Central Africa analysed in our study, as in *An. moucheti* (Table S2).

249

250 In Central African *Anopheles*, *Wolbachia* acquisition seems to be independent of the  
251 host phylogeny (Figs 3 and 4). Our results revealed that the genetic distances between  
252 *Wolbachia* and *Anopheles* are not positively correlated (Mantel test,  $p > 0.05$ ) (Fig.  
253 S2). Therefore, *Wolbachia* evolves independently of the host lineage, suggesting that  
254 lateral transfers (i.e., predation <sup>49</sup>, parasitism <sup>50</sup>) are the principal ways for *Wolbachia*  
255 acquisition in Gabonese *Anopheles*. For instance, it could be the situation between *An.*  
256 *moucheti*, *An. marshallii* *An. gambiae* and *An. coluzzii*, which share similar  
257 *Wolbachia* strains. Although the different larval ecology between those species would  
258 suggest other ways of lateral transfer (i.e. during nectar feeding <sup>32</sup>). On the other hand,  
259 we found that all the *Anopheles* species belonging to the same complex shared related  
260 *Wolbachia* strains (Fig. 4). Permeable reproductive barriers among members of the  
261 same complex could facilitate the intermittent movement of the bacterium <sup>51</sup>.  
262 Interestingly, although they share similar *Wolbachia* strains, sibling species showed  
263 different infection prevalence. Indeed, *An. carnevalei* and *An. m. nigeriensis* exhibited  
264 frequencies lower than 15%, whereas *An. nili* and *An. moucheti*, their respective  
265 counterparts and the most important malaria vectors in their complex, displayed

266 frequencies higher than 60% (Table 1). Moreover, our *An. gambiae* and *An. coluzzii*  
267 populations are infected by different *Wolbachia* strains than those detected in Burkina  
268 Faso and Mali. Similarly, in mosquitoes<sup>41</sup> and ants<sup>52</sup>, the same species is infected by  
269 different *Wolbachia* strains according to the region. The availability of whole-genome  
270 sequences for *Wolbachia* strains will enlighten the intricate phylogenetic relationships  
271 among the different strains in *Anopheles*<sup>53</sup>.

272

## 273 **Conclusions**

274 *Wolbachia* has emerged as a tangible and compelling tool for controlling vector-borne  
275 diseases<sup>13,14</sup>. In this study, we demonstrated the natural presence of this  
276 endosymbiont bacterium in a large number of *Anopheles* species, including the five  
277 major malaria vectors in Central Africa. It has been shown that *Wolbachia* ability to  
278 interfere with pathogen transmission depends on the bacterium strain. Therefore, our  
279 results offer the opportunity to determine the roles of the different *Anopheles*-  
280 infecting *Wolbachia* strains in suppressing *Plasmodium* transmission and/or  
281 manipulating *Anopheles* reproduction. For instance, the three most infected species  
282 (*An. moucheti*, *An. nili* and *An. vinckei*) play an important role in human (the first  
283 two) and non-human malaria transmission in the deep forest of Gabon<sup>54,55</sup>. Therefore,  
284 we could investigate *Wolbachia* positive<sup>20</sup> and negative<sup>56,57</sup> effects on the  
285 susceptibility to *Plasmodium* infection in their natural hosts. Moreover, the strongest  
286 phenotype impact on suppressing pathogen transmission or reproductive manipulation  
287 has been observed in exogenous *Wolbachia* infections<sup>15,17,58,59</sup>. Therefore, the  
288 availability of *Wolbachia* strains that infect natural *Anopheles* populations offers  
289 promising opportunities for experimental and theoretical studies on *Anopheles*, but  
290 also on other mosquito families that are vectors of other diseases, including *Ae.*

291 *aegypti* and *Ae. albopictus*. In conclusion, our findings are merely the “tip of the  
292 iceberg” in the research field on *Wolbachia* use to control vector-borne diseases,  
293 particularly in malaria.

294

## 295 **Methods**

### 296 **Research and ethics statements**

297 Mosquitoes were collected in Gabon under the research authorization  
298 AR0013/16/MESRS/CENAREST/CG/CST/CSAR and the national park entry  
299 authorization AE16008/PR/ANPN/SE/CS/AEPN. Mosquito sampling using the  
300 human-landing catch (HLC) method was performed under the protocol  
301 0031/2014/SG/CNE approved by the National Research Ethics Committee of Gabon.

302

### 303 **Mosquito sampling and DNA extraction**

304 Mosquitoes were sampled in eight sites across Gabon, Central Africa, from 2012 to  
305 2016 (Fig 1, Table 1, Fig. S1). These sites included sylvatic (national parks) and  
306 anthropic habitats (villages and cities). Adult females were collected using CDC light  
307 traps, BG traps and HLC. Collected specimens were taxonomically identified  
308 according to standard morphological features<sup>25,60</sup>. Then, they were individually stored  
309 in 1.5 mL tubes at -20°C and sent to CIRMF for molecular analysis. When possible,  
310 at least 30 mosquitoes (from 1 to 58) for each *Anopheles* species from different sites  
311 were selected for genomic analysis. Total genomic DNA was extracted from the  
312 whole body using the DNeasy Blood and Tissue Kit (Qiagen) according to the  
313 manufacturer’s instructions. Genomic DNA was eluted in 100 µL of TE buffer.  
314 Specimens belonging to the *An. gambiae* complex, *An. funestus* group, *An. moucheti*

315 complex and *An. nili* complex were molecularly identified using PCR-based  
316 diagnostic protocols<sup>26-29,61</sup>.

317

### 318 ***Wolbachia* screening and Multi Locus Sequence Typing (MLST) analysis**

319 *Wolbachia* infection in adult females was detected by nested PCR amplification of a  
320 *Wolbachia*-specific *16S* rDNA fragment (~400 bp) using 2 µL of host genomic DNA,  
321 according to the protocol developed in Catteruccia's laboratory<sup>20</sup>. Amplification of  
322 this *16S* rDNA fragment in infected *Aedes albopictus* and *Culex pipiens* genomic  
323 DNA (data not shown) confirmed the performance of this nested PCR protocol to  
324 detect *Wolbachia* in broad number of mosquitoes<sup>20</sup>. In order to avoid potential  
325 contaminations, we used *Ae. albopictus* and *Cx quinquefasciatus* from Gabon as  
326 positive controls. As negative controls, we used water and *Ae. aegypti*. Moreover, we  
327 included species and timing control, carrying out the PCR amplifications for each  
328 species independently and in different days. The amplicon size was checked on 1.5%  
329 agarose gels, and amplified *16S* rDNA fragments were sent to Genewiz (UK) for  
330 sequencing (forward and reverse) to confirm the presence of *Wolbachia*-specific  
331 sequences. The DNA quality of all samples was confirmed by the successful  
332 amplification of a fragment (~800 bp) of the mitochondrial gene *COII* in all the  
333 *Anopheles* species under study<sup>30,62</sup>. PCR products were run on 1.5% agarose gels, and  
334 *COII* fragments from 176 mosquito specimens of the 25 species were sequenced  
335 (forward and reverse) by Genewiz (UK) for the *Anopheles* phylogenetic studies.  
336 *Wolbachia*-positive genomic DNA samples (2 µL/sample) were then genotyped by  
337 MLST using three loci, *coxA* (~450 bp) *ftsZ* (~500 bp) and *fbpA* (~460 bp)<sup>63</sup>, and  
338 according to standard conditions<sup>37</sup>. If the three fragments could not be amplified, a  
339 newly-developed nested PCR protocol was used. Specifically, after the first run with

340 the standard primers, 2  $\mu$ L of the obtained product was amplified again using internal  
341 primers specific for each gene: *coxA* (*coxA*\_NF-2: 5'-  
342 TTTAACATGCGCGCAAAAGG-3'; *coxA*\_NR-2: 5'-  
343 TAAGCCCAACAGTGAACATATG-3'), *ftsZ* (*ftsZ*\_NF-2: 5'-  
344 ATGGGCGGTGGTACTGGAAC-3'; *ftsZ*\_NR-2: 5'-  
345 AGCACTAATTGCCCTATCTTCT-3'), and *fbpA* (*fbpA*\_NF-1: 5'-  
346 AGCTTAACTTCTGATCAAGCA-3'; *fbpA*\_NR-1: 5'-  
347 TTCTTTTTCCTGCAAAGCAAG-3'). Cycling conditions for *coxA* and *ftsZ* were:  
348 94°C for 5min followed by 36 cycles at 94°C for 15s, 55°C for 15s and 72°C for 30s,  
349 and a final extension step at 72°C for 10min. For *fbpA*, they were: 94°C for 5min  
350 followed by 36 cycles at 94°C for 30s, 59°C for 45s and 72°C for 90s, and a final  
351 extension step at 72°C for 10 min. The resulting fragments (*coxA*, 357bp; *fbpA*, 358-  
352 bp; and *ftsZ*, 424-bp) were sequenced bidirectionally by Genewiz (UK). The new  
353 sequences obtained in this study were submitted to GenBank (accession numbers XX  
354 to XX, Supplementary Table 1).

355

### 356 *Phylogenetic and statistical analysis*

357 All *Wolbachia* sequences for the *16S*, *coxA*, *fbpA* and *ftsZ* gene fragments and for  
358 *Anopheles* COII were corrected using *Geneious* R10<sup>64</sup>. The resulting consensus  
359 sequences for each gene were aligned with sequences that represent the main known  
360 *Wolbachia* supergroups obtained from GenBank (see Table S1). Only unique  
361 haplotypes for each species were included in the analysis. Inference of phylogenetic  
362 trees was performed using the maximum likelihood (ML) method and RAxML<sup>65</sup> with  
363 a substitution model GTR + CAT<sup>66</sup> and 1000 bootstrapping replicates. Finally, all  
364 MLST *Wolbachia* sequences were used to build phylogenetic trees using RAxML

365 (GTR+CAT model, 1000 bootstrapping replicates). Trees were visualized with iTOL  
366 v.3.4.3<sup>67</sup>.

367 To quantify the accuracy of the observed *Wolbachia* infection prevalence, the  
368 influence of sample size on its estimation was assessed. Assuming that *Wolbachia*  
369 prevalence within a host species follows a beta binomial distribution<sup>23</sup> yielding many  
370 species with a low or a high *Wolbachia* prevalence but few with an intermediate one,  
371 we quantified, for each sample size, the proportion of samples (over 1,000  
372 realizations) that could yield an estimate that was not significantly different from the  
373 prevalence over the whole population with a z-test and a significance threshold at  
374 95%. As expected, sample size can be small for very low or very high prevalence (60  
375 individuals are enough in 95% of cases for these extreme prevalence), while it has to  
376 be much higher for intermediate prevalence values (up to 150 individuals for a  
377 prevalence close to 50%).

378

379 All statistical analyses were performed using “R” v3.2.5 (R Development Core Team,  
380 <http://cran.r-project.org/>), with the addition of the “ggplot2” library<sup>68</sup>.

381

### 382 **Author contributions**

383 D.A., O.D. and C.P. designed the experiments. D.A., O.A., N.R. and P.K., performed  
384 the experiments. D.A., F.S., C.C., O.D and C.P. analysed the data. D.A. performed the  
385 sequencing analysis. D.A. and B.R. performed the statistical analysis. D.A., N.R.,  
386 M.N., F.M., B.M., C.P. and F.P. provided samples for the analysis. D.A., O.D. and  
387 C.P. wrote the manuscript.

388

### 389 **Competing interests**



390 The authors declare no competing interests.

391

## 392 **Acknowledgements**

393 We thank the “Agence Nationale de la Preservation de la Nature” (ANPN) and the  
394 “Centre National de la Recherche Scientifique et Technologique of Gabon”  
395 (CENAREST) that authorized this study and facilitated the access to the national  
396 parks of La Lopé, Moukalaba-Doudou and Plateaux Batékés. We specially thank  
397 Sonia Lekana for helping with the preliminary sequencing analysis.

398

## 399 **References**

- 400 1 WHO. World Malaria Report 2015. (World Health Organization, 2015).  
401 2 Bhatt, S. *et al.* The effect of malaria control on *Plasmodium falciparum* in  
402 Africa between 2000 and 2015. *Nature* **526**, 207-+,  
403 doi:10.1038/nature15535 (2015).  
404 3 Griffi, J. T. *et al.* Potential for reduction of burden and local elimination of  
405 malaria by reducing *Plasmodium falciparum* malaria transmission: a  
406 mathematical modelling study. *Lancet Infect. Dis.* **16**, 465-472,  
407 doi:10.1016/s1473-3099(15)00423-5 (2016).  
408 4 Ranson, H. & Lissenden, N. Insecticide Resistance in African Anopheles  
409 Mosquitoes: A Worsening Situation that Needs Urgent Action to Maintain  
410 Malaria Control. *Trends in Parasitology* **32**, 187-196,  
411 doi:10.1016/j.pt.2015.11.010 (2016).  
412 5 Pates, H. & Curtis, C. in *Annual Review of Entomology* Vol. 50 *Annual*  
413 *Review of Entomology* 53-70 (Annual Reviews, 2005).  
414 6 Newby, G. *et al.* The path to eradication: a progress report on the malaria-  
415 eliminating countries. *Lancet* **387**, 1775-1784 (2016).  
416 7 McGraw, E. A. & O'Neill, S. L. Beyond insecticides: new thinking on an  
417 ancient problem. *Nat Rev Micro* **11**, 181-193 (2013).  
418 8 Hoffmann, A. A., Ross, P. A. & Rasic, G. Wolbachia strains for disease  
419 control: ecological and evolutionary considerations. *Evolutionary*  
420 *Applications* **8**, 751-768, doi:10.1111/eva.12286 (2015).  
421 9 Bourtzis, K. *et al.* Harnessing mosquito-Wolbachia symbiosis for vector  
422 and disease control. *Acta Tropica* **132**, S150-S163,  
423 doi:10.1016/j.actatropica.2013.11.004 (2014).  
424 10 Kambris, Z., Cook, P. E., Phuc, H. K. & Sinkins, S. P. Immune Activation by  
425 Life-Shortening Wolbachia and Reduced Filarial Competence in  
426 Mosquitoes. *Science* **326**, 134-136, doi:10.1126/science.1177531 (2009).

- 427 11 Iturbe-Ormaetxe, I., Walker, T. & Neill, S. L. O. Wolbachia and the  
428 biological control of mosquito-borne disease. *Embo Reports* **12**, 508-518,  
429 doi:10.1038/embor.2011.84 (2011).
- 430 12 Werren, J. H., Baldo, L. & Clark, M. E. Wolbachia: master manipulators of  
431 invertebrate biology. *Nature Reviews Microbiology* **6**, 741-751,  
432 doi:10.1038/nrmicro1969 (2008).
- 433 13 Hoffmann, A. A. *et al.* Successful establishment of Wolbachia in *Aedes*  
434 populations to suppress dengue transmission. *Nature* **476**, 454-U107,  
435 doi:10.1038/nature10356 (2011).
- 436 14 Schmidt, T. L. *et al.* Local introduction and heterogeneous spatial spread  
437 of dengue-suppressing Wolbachia through an urban population of *Aedes*  
438 *aegypti*. *PLOS Biology* **15**, e2001894, doi:10.1371/journal.pbio.2001894  
439 (2017).
- 440 15 Hughes, G. L., Koga, R., Xue, P., Fukatsu, T. & Rasgon, J. L. Wolbachia  
441 Infections Are Virulent and Inhibit the Human Malaria Parasite  
442 *Plasmodium Falciparum* in *Anopheles Gambiae*. *Plos Pathogens* **7**,  
443 doi:10.1371/journal.ppat.1002043 (2011).
- 444 16 Kambris, Z. *et al.* Wolbachia Stimulates Immune Gene Expression and  
445 Inhibits *Plasmodium* Development in *Anopheles gambiae*. *Plos Pathogens*  
446 **6**, doi:10.1371/journal.ppat.1001143 (2010).
- 447 17 Bian, G. *et al.* Wolbachia Invades *Anopheles stephensi* Populations and  
448 Induces Refractoriness to *Plasmodium* Infection. *Science* **340**, 748-751,  
449 doi:10.1126/science.1236192 (2013).
- 450 18 Hughes, G. L. *et al.* Native microbiome impedes vertical transmission of  
451 Wolbachia in *Anopheles* mosquitoes. *Proceedings of the National Academy*  
452 *of Sciences* **111**, 12498-12503, doi:10.1073/pnas.1408888111 (2014).
- 453 19 Baldini, F. *et al.* Evidence of natural Wolbachia infections in field  
454 populations of *Anopheles gambiae*. *Nature Communications* **5**,  
455 doi:10.1038/ncomms4985 (2014).
- 456 20 Shaw, W. R. *et al.* Wolbachia infections in natural *Anopheles* populations  
457 affect egg laying and negatively correlate with *Plasmodium* development.  
458 *Nature Communications* **7**, doi:10.1038/ncomms11772 (2016).
- 459 21 Gomes, F. M. *et al.* Effect of naturally occurring *Wolbachia* in *Anopheles*  
460 *gambiae s.l.* mosquitoes from Mali on *Plasmodium falciparum* malaria  
461 transmission. *PNAS* **114**, 12566-12571, doi:10.1073/pnas.1716181114  
462 (2017).
- 463 22 Duron, O. *et al.* The diversity of reproductive parasites among arthropods:  
464 Wolbachia do not walk alone. *Bmc Biology* **6**, doi:10.1186/1741-7007-6-  
465 27 (2008).
- 466 23 Zug, R. & Hammerstein, P. Still a Host of Hosts for Wolbachia: Analysis of  
467 Recent Data Suggests That 40% of Terrestrial Arthropod Species Are  
468 Infected. *Plos One* **7**, doi:10.1371/journal.pone.0038544 (2012).
- 469 24 Osei-Poku, J., Han, C., Mbogo, C. M. & Jiggins, F. M. Identification of  
470 Wolbachia Strains in Mosquito Disease Vectors. *PLOS ONE* **7**, e49922,  
471 doi:10.1371/journal.pone.0049922 (2012).
- 472 25 Gillies, M. T. & Coetzee, M. C. *A Supplement to the Anophelinae of Africa*  
473 *South of the Sahara (Afrotropical region)*. (The South African Institute for  
474 Medical Research, 1987).

- 475 26 Santolamazza, F. *et al.* Insertion polymorphisms of SINE200  
476 retrotransposons within speciation islands of *Anopheles gambiae*  
477 molecular forms. *Malar J* **7**, 163, doi:1475-2875-7-163 [pii]  
478 10.1186/1475-2875-7-163 (2008).
- 479 27 Cohuet, A. *et al.* Species identification within the *Anopheles funestus* group  
480 of malaria vectors in Cameroon and evidence for a new species. *American*  
481 *Journal of Tropical Medicine and Hygiene* **69**, 200-205 (2003).
- 482 28 Kengne, P. *et al.* Molecular differentiation of three closely related  
483 members of the mosquito species complex, *Anopheles moucheti*, by  
484 mitochondrial and ribosomal DNA polymorphism. *Medical and Veterinary*  
485 *Entomology* **21**, 177-182 (2007).
- 486 29 Kengne, P., Awono-Ambene, P., Nkondjio, C. A., Simard, F. & Fontenille, D.  
487 Molecular identification of the *Anopheles nili* group of African malaria  
488 vectors. *Medical and Veterinary Entomology* **17**, 67-74,  
489 doi:doi:10.1046/j.1365-2915.2003.00411.x (2003).
- 490 30 Rahola, N. *et al.* Description of *Anopheles gabonensis*, a new species  
491 potentially involved in rodent malaria transmission in Gabon, Central  
492 Africa. *Infection Genetics and Evolution* **28**, 628-634,  
493 doi:10.1016/j.meegid.2014.05.012 (2014).
- 494 31 Ahmed, M. Z., De Barro, P. J., Ren, S. X., Greeff, J. M. & Qiu, B. L. Evidence for  
495 horizontal transmission of secondary endosymbionts in the *Bemisia*  
496 *tabaci* cryptic species complex. *PLoS One* **8**, e53084,  
497 doi:10.1371/journal.pone.0053084 (2013).
- 498 32 Li, S. J. *et al.* Plant-mediated horizontal transmission of *Wolbachia*  
499 between whiteflies. *The ISME journal* **11**, 1019-1028,  
500 doi:10.1038/ismej.2016.164 (2017).
- 501 33 Werren, J. H., Zhang, W. & Guo, L. R. Evolution and phylogeny of  
502 *Wolbachia*: reproductive parasites of arthropods. *Proc Biol Sci* **261**, 55-63,  
503 doi:10.1098/rspb.1995.0117 (1995).
- 504 34 Sinkins, S. P., Braig, H. R. & Oneill, S. L. WOLBACHIA SUPERINFECTIONS  
505 AND THE EXPRESSION OF CYTOPLASMIC INCOMPATIBILITY. *Proceedings*  
506 *of the Royal Society B-Biological Sciences* **261**, 325-330,  
507 doi:10.1098/rspb.1995.0154 (1995).
- 508 35 Casiraghi, M., Anderson, T. J. C., Bandi, C., Bazzocchi, C. & Genchi, C. A  
509 phylogenetic analysis of filarial nematodes: comparison with the  
510 phylogeny of *Wolbachia* endosymbionts. *Parasitology* **122**, 93-103,  
511 doi:10.1017/s0031182000007149 (2001).
- 512 36 Simon, F. *et al.* Human and Animal Dirofilariasis: the Emergence of a  
513 Zoonotic Mosaic. *Clinical Microbiology Reviews* **25**, 507-+,  
514 doi:10.1128/cmr.00012-12 (2012).
- 515 37 Baldo, L. *et al.* Multilocus sequence typing system for the endosymbiont  
516 *Wolbachia pipientis*. *Appl Environ Microbiol* **72**, doi:10.1128/aem.00731-  
517 06 (2006).
- 518 38 Richardson, M. F. *et al.* Population Genomics of the *Wolbachia*  
519 Endosymbiont in *Drosophila melanogaster*. *PLOS Genetics* **8**, e1003129,  
520 doi:10.1371/journal.pgen.1003129 (2012).
- 521 39 Charlat, S. *et al.* The joint evolutionary histories of *Wolbachia* and  
522 mitochondria in *Hypolimnas bolina*. *BMC Evolutionary Biology* **9**, 64,  
523 doi:10.1186/1471-2148-9-64 (2009).

- 524 40 Engelstadter, J. & Hurst, G. D. D. The Ecology and Evolution of Microbes  
525 that Manipulate Host Reproduction. *Annual Review of Ecology Evolution*  
526 *and Systematics* **40**, 127-149,  
527 doi:10.1146/annurev.ecolsys.110308.120206 (2009).
- 528 41 Dumas, E. *et al.* Population structure of Wolbachia and cytoplasmic  
529 introgression in a complex of mosquito species. *Bmc Evolutionary Biology*  
530 **13**, doi:10.1186/1471-2148-13-181 (2013).
- 531 42 Arthofer, W., Riegler, M., Avtzis, D. N. & Stauffer, C. Evidence for low-titre  
532 infections in insect symbiosis: Wolbachia in the bark beetle *Pityogenes*  
533 *chalcographus* (Coleoptera, Scolytinae). *Environmental Microbiology* **11**,  
534 1923-1933, doi:10.1111/j.1462-2920.2009.01914.x (2009).
- 535 43 Augustinos, A. A. *et al.* Detection and Characterization of Wolbachia  
536 Infections in Natural Populations of Aphids: Is the Hidden Diversity Fully  
537 Unraveled? *Plos One* **6**, doi:10.1371/journal.pone.0028695 (2011).
- 538 44 Woolfit, M., Iturbe-Ormaetxe, I., McGraw, E. A. & O'Neill, S. L. An Ancient  
539 Horizontal Gene Transfer between Mosquito and the Endosymbiotic  
540 Bacterium *Wolbachia pipientis*. *Mol. Biol. Evol.* **26**, 367-374,  
541 doi:10.1093/molbev/msn253 (2009).
- 542 45 Dunning Hotopp, J. C. *et al.* Widespread lateral gene transfer from  
543 intracellular bacteria to multicellular eukaryotes. *Science* **317**, 1753-  
544 1756, doi:10.1126/science.1142490 (2007).
- 545 46 Robert, V., Ayala, D. & Simard, F. in *Entomologie médicale et vétérinaire*  
546 (eds G. Duvallet, D. Fontenille, & V. Robert) (IRD Editions, 2017).
- 547 47 Clements, A. N. *The Biology of Mosquitoes: Development, Nutrition and*  
548 *Reproduction v. 1.* (CABI Publishing, 1999).
- 549 48 Simmons, T. W. & Hutchinson, M. L. A Critical Review of All Known  
550 Published Records for Water Mite (Acari: Hydrachnidiae) and Mosquito  
551 (Diptera: Culicidae) Parasitic Associations From 1975 to Present. *Journal*  
552 *of Medical Entomology* **53**, 737-752, doi:10.1093/jme/tjw052 (2016).
- 553 49 Le Clec'h, W. *et al.* Cannibalism and Predation as Paths for Horizontal  
554 Passage of Wolbachia between Terrestrial Isopods. *Plos One* **8**,  
555 doi:10.1371/journal.pone.0060232 (2013).
- 556 50 Plantard, O. *et al.* Detection of Wolbachia in the Tick *Ixodes ricinus* is Due  
557 to the Presence of the Hymenoptera Endoparasitoid *Ixodiphagus hookeri*.  
558 *Plos One* **7**, doi:10.1371/journal.pone.0030692 (2012).
- 559 51 Pombi, M. *et al.* Dissecting functional components of reproductive  
560 isolation among closely related sympatric species of the *Anopheles*  
561 *gambiae* complex. *Evolutionary Applications* **10**, 1102-1120,  
562 doi:10.1111/eva.12517 (2017).
- 563 52 Tsutsui, N. D., Kauppinen, S. N., Oyafuso, A. F. & Grosberg, R. K. The  
564 distribution and evolutionary history of Wolbachia infection in native and  
565 introduced populations of the invasive argentine ant (*Linepithema*  
566 *humile*). *Molecular Ecology* **12**, 3057-3068, doi:10.1046/j.1365-  
567 294X.2003.01979.x (2003).
- 568 53 Gerth, M., Gansauge, M. T., Weigert, A. & Bleidorn, C. Phylogenomic  
569 analyses uncover origin and spread of the Wolbachia pandemic. *Nature*  
570 *Communications* **5**, doi:10.1038/ncomms6117 (2014).

- 571 54 Makanga, B. *et al.* Ape malaria transmission and potential for ape-to-  
572 human transfers in Africa. *PNAS* **113**, 5329-5334,  
573 doi:10.1073/pnas.1603008113 (2016).
- 574 55 Paupy, C. *et al.* Anopheles moucheti and Anopheles vinckei Are Candidate  
575 Vectors of Ape Plasmodium Parasites, Including Plasmodium  
576 praefalciparum in Gabon. *PLoS ONE* **8**, doi:e57294  
577 10.1371/journal.pone.0057294 (2013).
- 578 56 Hughes, G. L., Rivero, A. & Rasgon, J. L. Wolbachia Can Enhance  
579 Plasmodium Infection in Mosquitoes: Implications for Malaria Control?  
580 *Plos Pathogens* **10**, doi:10.1371/journal.ppat.1004182 (2014).
- 581 57 Zele, F. *et al.* Wolbachia increases susceptibility to Plasmodium infection  
582 in a natural system. *Proceedings of the Royal Society B-Biological Sciences*  
583 **281**, doi:10.1098/rspb.2013.2837 (2014).
- 584 58 Blagrove, M. S. C., Arias-Goeta, C., Failloux, A. B. & Sinkins, S. P. Wolbachia  
585 strain wMel induces cytoplasmic incompatibility and blocks dengue  
586 transmission in Aedes albopictus. *Proceedings of the National Academy of  
587 Sciences of the United States of America* **109**, 255-260,  
588 doi:10.1073/pnas.1112021108 (2012).
- 589 59 Moreira, L. A. *et al.* A Wolbachia Symbiont in Aedes aegypti Limits  
590 Infection with Dengue, Chikungunya, and Plasmodium. *Cell* **139**, 1268-  
591 1278, doi:10.1016/j.cell.2009.11.042 (2009).
- 592 60 Gillies, M. T. & de Meillon, B. *The anophelinae of Africa, south of the Sahara*.  
593 Vol. 54 (The South African Institute for Medical Research, 1968).
- 594 61 Fanello, C., Santolamazza, F. & della Torre, A. Simultaneous identification  
595 of species and molecular forms of the *Anopheles gambiae* complex by PCR-  
596 RFLP. *Medical and Veterinary Entomology* **16**, 461-464 (2002).
- 597 62 Ndo, C. *et al.* Population genetic structure of the malaria vector *Anopheles  
598 nili* in sub-Saharan Africa. *Malaria Journal* **9**, doi:161  
599 10.1186/1475-2875-9-161 (2010).
- 600 63 Baldo, L. *et al.* Multilocus sequence typing system for the endosymbiont  
601 Wolbachia pipientis. *Applied and Environmental Microbiology* **72**, 7098-  
602 7110, doi:10.1128/aem.00731-06 (2006).
- 603 64 Kearse, M. *et al.* Geneious Basic: An integrated and extendable desktop  
604 software platform for the organization and analysis of sequence data.  
605 *Bioinformatics* **28**, 1647-1649, doi:10.1093/bioinformatics/bts199  
606 (2012).
- 607 65 Stamatakis, A. RAxML version 8: a tool for phylogenetic analysis and post-  
608 analysis of large phylogenies. *Bioinformatics* **30**, 1312-1313,  
609 doi:10.1093/bioinformatics/btu033 (2014).
- 610 66 Stamatakis, A. in *International Parallel and Distributed Processing  
611 Symposium*. (IEEE/ACM).
- 612 67 Letunic, I. & Bork, P. Interactive Tree Of Life (iTOL): an online tool for  
613 phylogenetic tree display and annotation. *Bioinformatics* **23**, 127-128,  
614 doi:10.1093/bioinformatics/btl529 (2007).
- 615 68 Wickham, H. *ggplot2: Elegant Graphics for Data Analysis*. (Springer  
616 Publishing Company, Incorporated, 2009).
- 617 69 Boundenga, L. *et al.* Haemosporidian Parasites of Antelopes and Other  
618 Vertebrates from Gabon, Central Africa. *PLoS One* **11**, e0148958,  
619 doi:10.1371/journal.pone.0148958 (2016).

- 620 70 Hamon, J. & Mouchet, J. Secondary vectors of human malaria in Africa.  
621 *Medecine tropicale : revue du Corps de sante colonial* **21**, 643-660 (1961).  
622 71 Olson, D. M. *et al.* Terrestrial ecoregions of the worlds: A new map of life  
623 on Earth. *Bioscience* **51**, 933-938, doi:10.1641/0006-  
624 3568(2001)051[0933:teotwa]2.0.co;2 (2001).  
625 72 Neafsey, D. E. *et al.* Highly evolvable malaria vectors: The genomes of 16  
626 *Anopheles* mosquitoes. *Science* **347**, 43-+, doi:10.1126/science.1258522  
627 (2015).  
628  
629

630 **Figures and Tables**

631

632 **Table 1.** Summary of the *Anopheles* species screened in this study.

| Group/complex | Species                 | Malaria role | Infected  | Tested     | Infection (%) |
|---------------|-------------------------|--------------|-----------|------------|---------------|
| gambiae       | <i>An. gambiae</i>      | H            | 5         | 44         | 11            |
|               | <i>An. coluzzii</i>     | H            | 2         | 58         | 3             |
|               | <i>An. brunnipes</i>    |              | 0         | 1          | 0             |
|               | <i>An. cinctus</i>      |              | 0         | 2          | 0             |
| moucheti      | <i>An. moucheti</i>     | H, P, A      | 30        | 42         | 71            |
|               | <i>An. nigeriensis</i>  | h            | 1         | 27         | 4             |
|               | <i>An. "GAB-2"</i>      |              | 5         | 8          | 63            |
|               | <i>An. "GAB-3"</i>      |              | 1         | 1          | 100           |
| funestus      | <i>An. gabonensis</i>   | A            | 0         | 29         | 0             |
|               | <i>An. funestus</i>     | H            | 2         | 37         | 5             |
|               | <i>An. implexus</i>     |              | 1         | 26         | 4             |
|               | <i>An. jebudensis</i>   |              | 1         | 2          | 50            |
| nili          | <i>An. maculipalpis</i> |              | 0         | 29         | 0             |
|               | <i>An. nili</i>         | H, A         | 11        | 19         | 58            |
|               | <i>An. carnevalei</i>   | h, A         | 2         | 29         | 7             |
|               | <i>An. "GAB-1"</i>      |              | 0         | 19         | 0             |
| coustani      | <i>An. hancocki</i>     | h            | 1         | 41         | 2             |
|               | <i>An. theileri</i>     | h            | 0         | 24         | 0             |
|               | <i>An. rodhesiensis</i> |              | 0         | 4          | 0             |
|               | <i>An. coustani</i>     | h, A         | 2         | 35         | 6             |
|               | <i>An. paludis</i>      | h, A         | 1         | 16         | 6             |
|               | <i>An. gr coustani</i>  | h            | 0         | 51         | 0             |
|               | <i>An. squamosus</i>    |              | 0         | 32         | 0             |
|               | <i>An. marshallii</i>   | h, P, A      | 2         | 42         | 5             |
|               | <i>An. vinckei</i>      | P, A         | 3         | 30         | 10            |
|               |                         |              | <b>70</b> | <b>648</b> |               |

633

634 Malaria role: known role for each species in malaria transmission<sup>46,54,69,70</sup> in humans

635 (H: major, h: secondary), primates (P), other animals (A), or unknown (blank).

636

637 **Figure 1.** Sampling sites and *Wolbachia* infection prevalence.

638 Map of Gabon showing the main African habitat types (<sup>71</sup>, freely available at  
639 [http://maps.tnc.org/gis\\_data.html](http://maps.tnc.org/gis_data.html)) and the sampled villages (black dots) was done  
640 using ArcGIS Basic v.10. The prevalence of *Wolbachia* infection (number of infected  
641 *Anopheles* species and individuals) per site is presented in bar charts. The pink colour  
642 indicates positive species/individuals and blue the total number of species/individuals  
643 screened for *Wolbachia* infection at that site. CCB: Cocobeach; LOP: Lopé; MKG:  
644 Mikongo; BTK: National Park of Plateaux Batékés; FCV: Franceville; LBV:  
645 Libreville; MKB: National Park of Moukalaba-Doudou; BKB: Bakoumba.

646

647 **Figure 2.** Probability of detecting *Wolbachia* infection.

648 The probability was estimated for each sample size an infection prevalence value. The  
649 probability of correct estimation follows a black-blue gradient. Dashed-line delimits  
650 the probability of infection detection at 90%.

651

652 **Figure 3.** Circular phylograms for the 16 *Anopheles* species that were infected with  
653 *Wolbachia*.

654 The phylogenetic trees were built with RAxML <sup>65</sup>. The names of the *Anopheles*  
655 species from which the *Wolbachia*-specific sequences were isolated in this study are  
656 shown in blue (positive for *Wolbachia* supergroup B), red (positive for supergroup A)  
657 and brown (positive for supergroup C), while the names of mosquitoes species  
658 (*Diptera*) from which the previously published *Wolbachia* sequences were isolated  
659 are in green. Red dots show branches supporting a bootstrap >70% from 1000  
660 replicates.. (A) Circular phylogenetic tree using the *Wolbachia*-specific 16S rRNA  
661 fragment and *Anaplasma marginale* as outgroup. Different *Wolbachia* strains found in



662 the same *Anopheles* species are connected by pink lines. Pink bar charts indicate the  
663 number of identical *Wolbachia* haplotypes found in each species. Scale bar  
664 corresponds to nucleotide substitutions per site. (B) Circular phylogenetic trees based  
665 on *coxA*, *fbpA* and *ftsZ* fragment sequences using *Dirofilaria immitis* (supergroup C)  
666 as outgroup. Specimens with a different supergroup assignment than *I6S* are marked  
667 with asterisks.

668

669 **Figure 4.** Maximum likelihood phylogeny of the 25 *Anopheles* species under study  
670 and *Wolbachia* haplotypes.

671 The tree was inferred with RAxML<sup>65</sup> using the sequences of *COII* fragments from  
672 176 *Anopheles* specimens belonging to the 25 species under study and rooted with  
673 *Anopheles darlingi* as outgroup (New World mosquito, diverged 100 Myr ago<sup>72</sup>). Red  
674 dots in branches represent bootstrap values >70% from 1000 replicates. The shape of  
675 each field column represent the *I6S* (rectangle), *coxA* (rhombus), *fbpA* (triangle) and  
676 *ftsZ* (hexagon) genes. The different *Wolbachia* gene haplotypes are indicated with  
677 colour codes (all pink = the newly identified wANMO strain). The bar chart size  
678 indicates the number of specimens for each haplotype and the colour their infection  
679 status: grey, non-infected; blue, infected by the *Wolbachia* supergroup B; red, infected  
680 by supergroup A; brown, infected by supergroup C.

681

682

683

684 **Supplementary Materials**

685 **Table S1.** Mosquitoes screened in this study and their accession numbers.

686 ID: Specimen identification name; Sites: Collection locations; Species: Morphological  
687 and molecular identification; COII\_hap: COII haplotype for each species; COII:  
688 accession number for cytochrome oxidase subunit II gene; 16S: accession number for  
689 16S rRNA gene; ftsZ: accession number for filamenting temperature-sensitive mutant  
690 Z protein; fbpA: accession number fructose-bisphosphate putative aldolase protein;  
691 coxA: accession number for cytochrome c oxidase subunit I.

692

693 **Text S1.** Mosquito taxonomic and molecular identification.

694

695 **Table S2.** *Anopheles moucheti* F1 used to estimate vertical transmission.

696

697 **Figure S1.** Rooted maximum likelihood phylogeny of the filarial *Wolbachia* sequence  
698 isolated from one *An. coustani* specimen.

699 The tree was inferred with RAxML<sup>65</sup> using the sequence of the filarial *COII* fragment  
700 amplified from the *An. coustani* specimen BNG78 (in blue) and public sequences  
701 (NCBI) and rooted with *Brugia malayi* as outgroup. The black dot on the branch  
702 indicate a bootstrap value >70% from 1000 replicates.

703

704 **Figure S2.** Scatterplot showing the genetic distances between *Wolbachia* strains (16S)  
705 and infected *Anopheles* species (*COII*).

706 Genetic distances were estimated as the number of different bases between the  
707 sequences of each pair of infected *Anopheles* specimens. The smoothed conditional

708 mean (blue line) and the 95% confidence intervals (grey area) were plotted using the  
709 smoothing “gam” function of the ggplot2 library<sup>68</sup>.

710

711

712

713

714

715

716

717

### Major Habitat Types

-  Mangroves
-  Savanna
-  Rainforest
-  Water

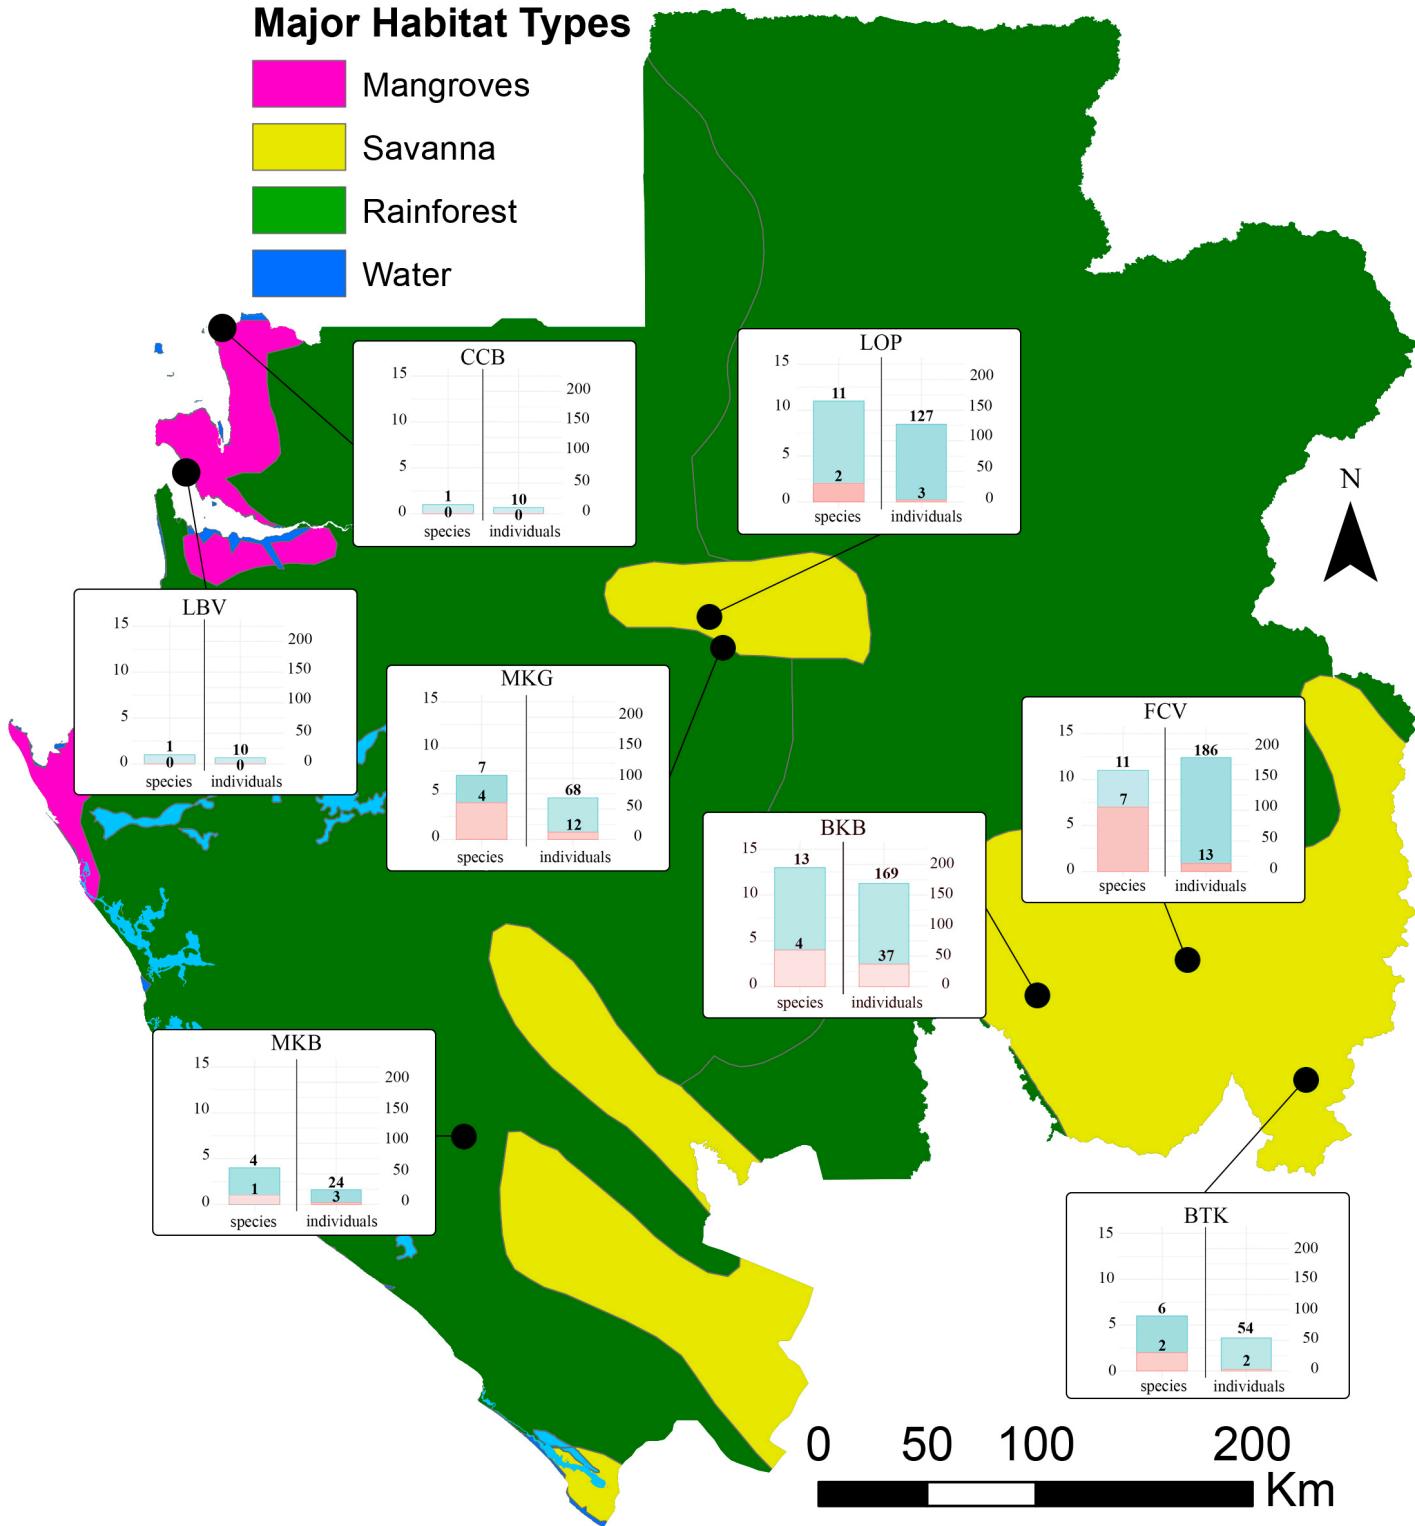

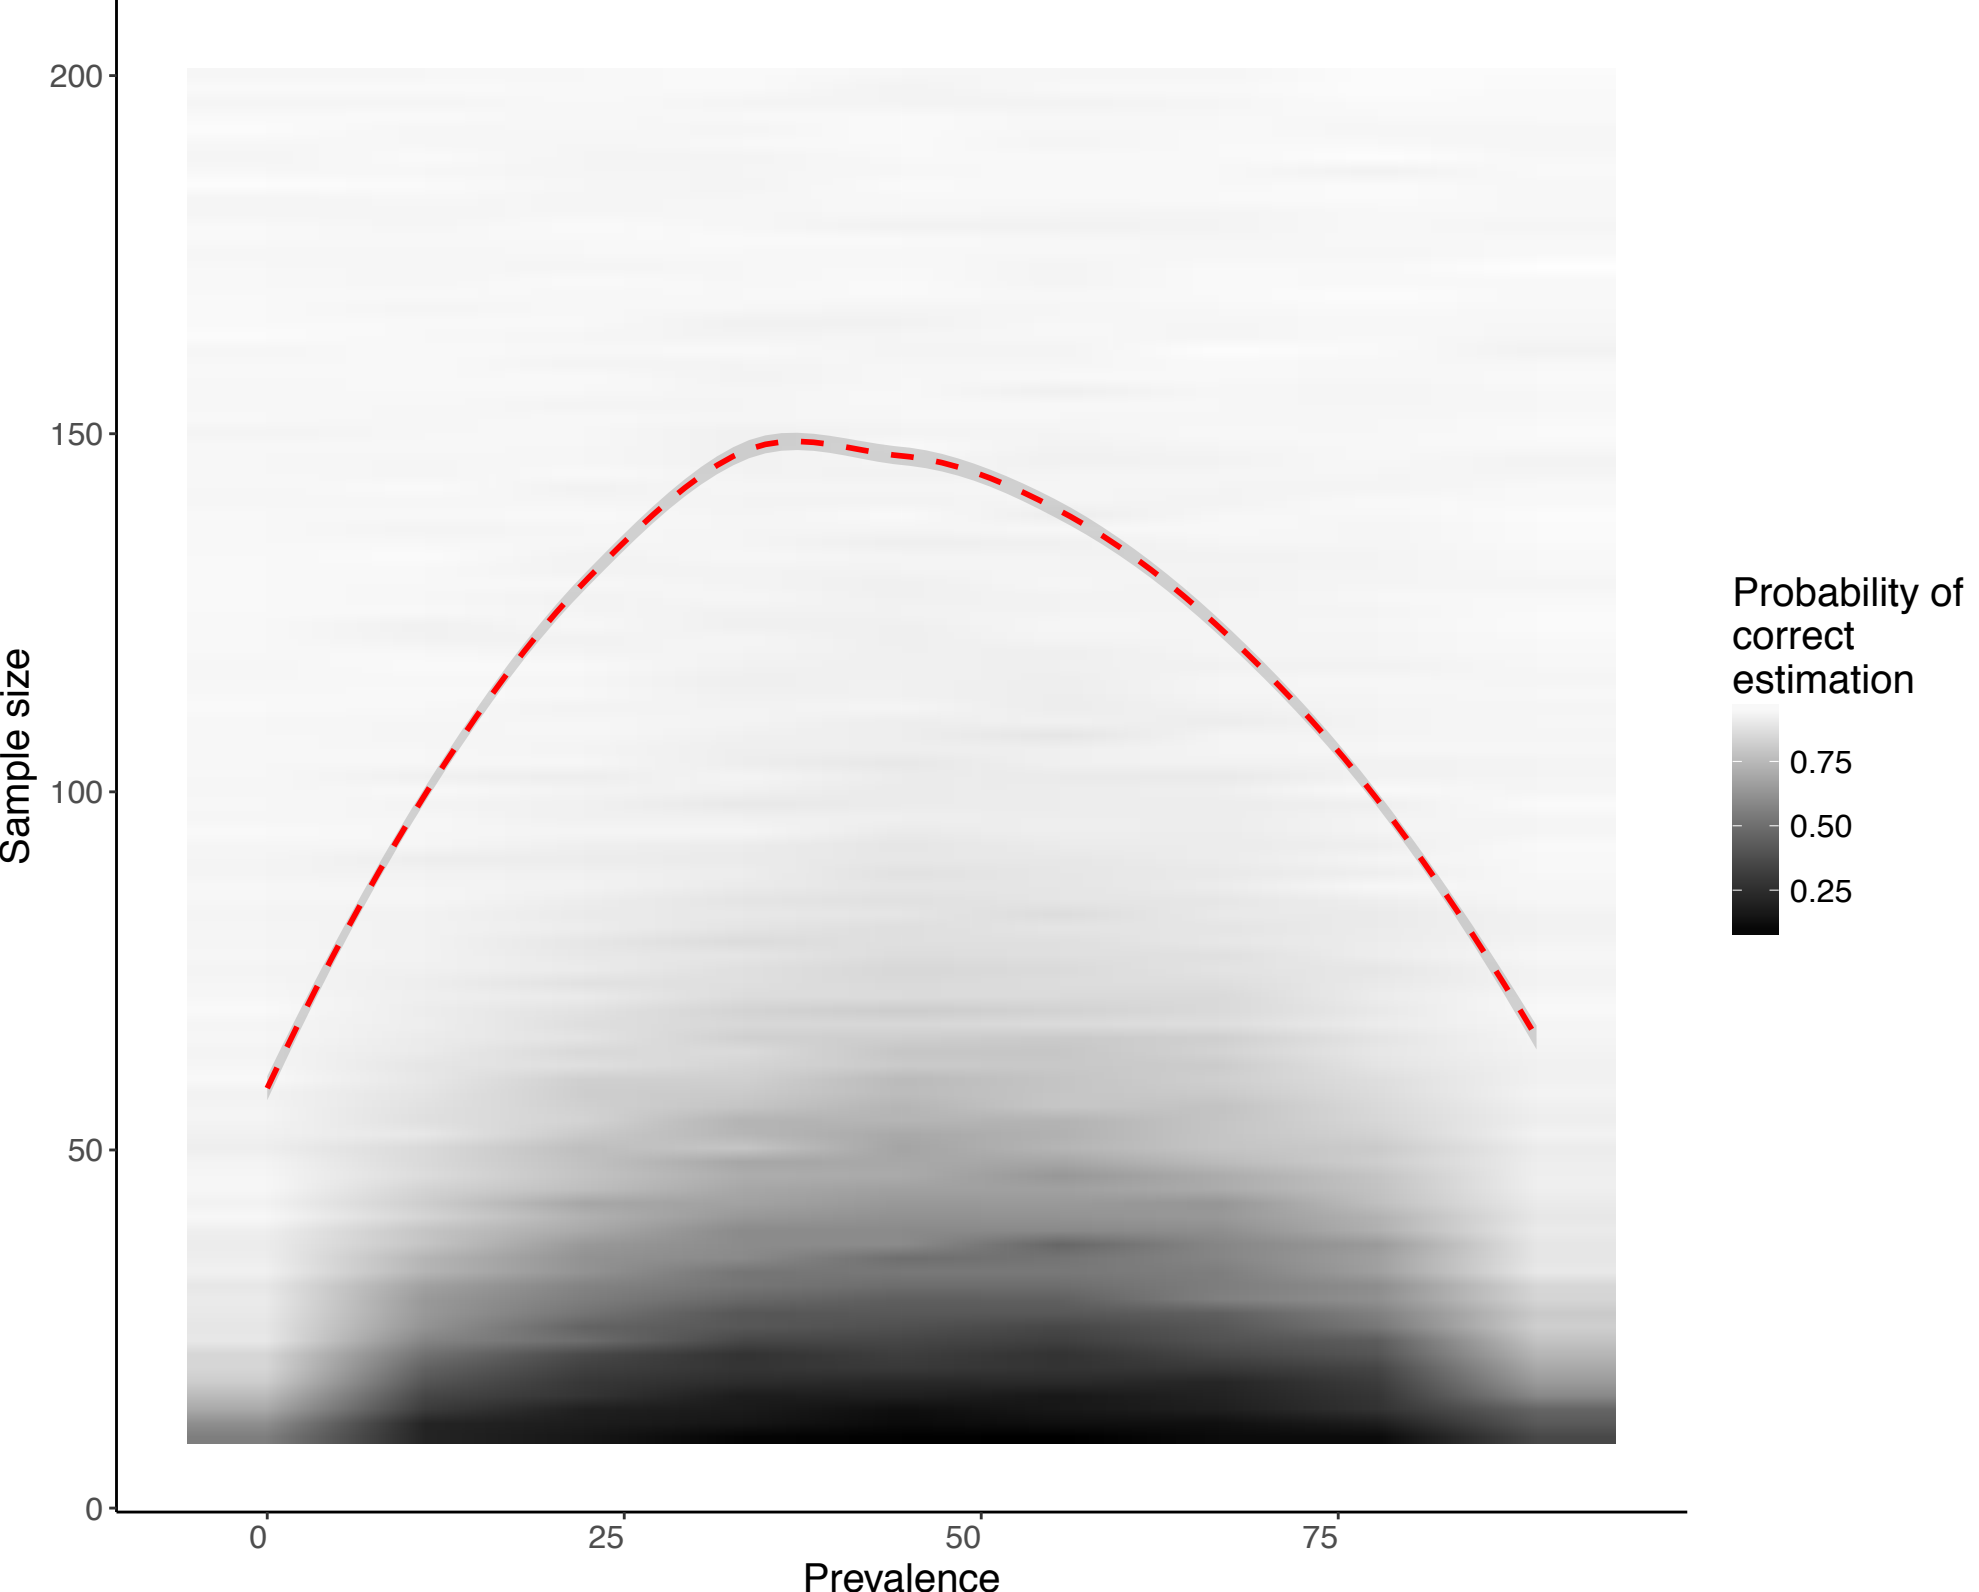



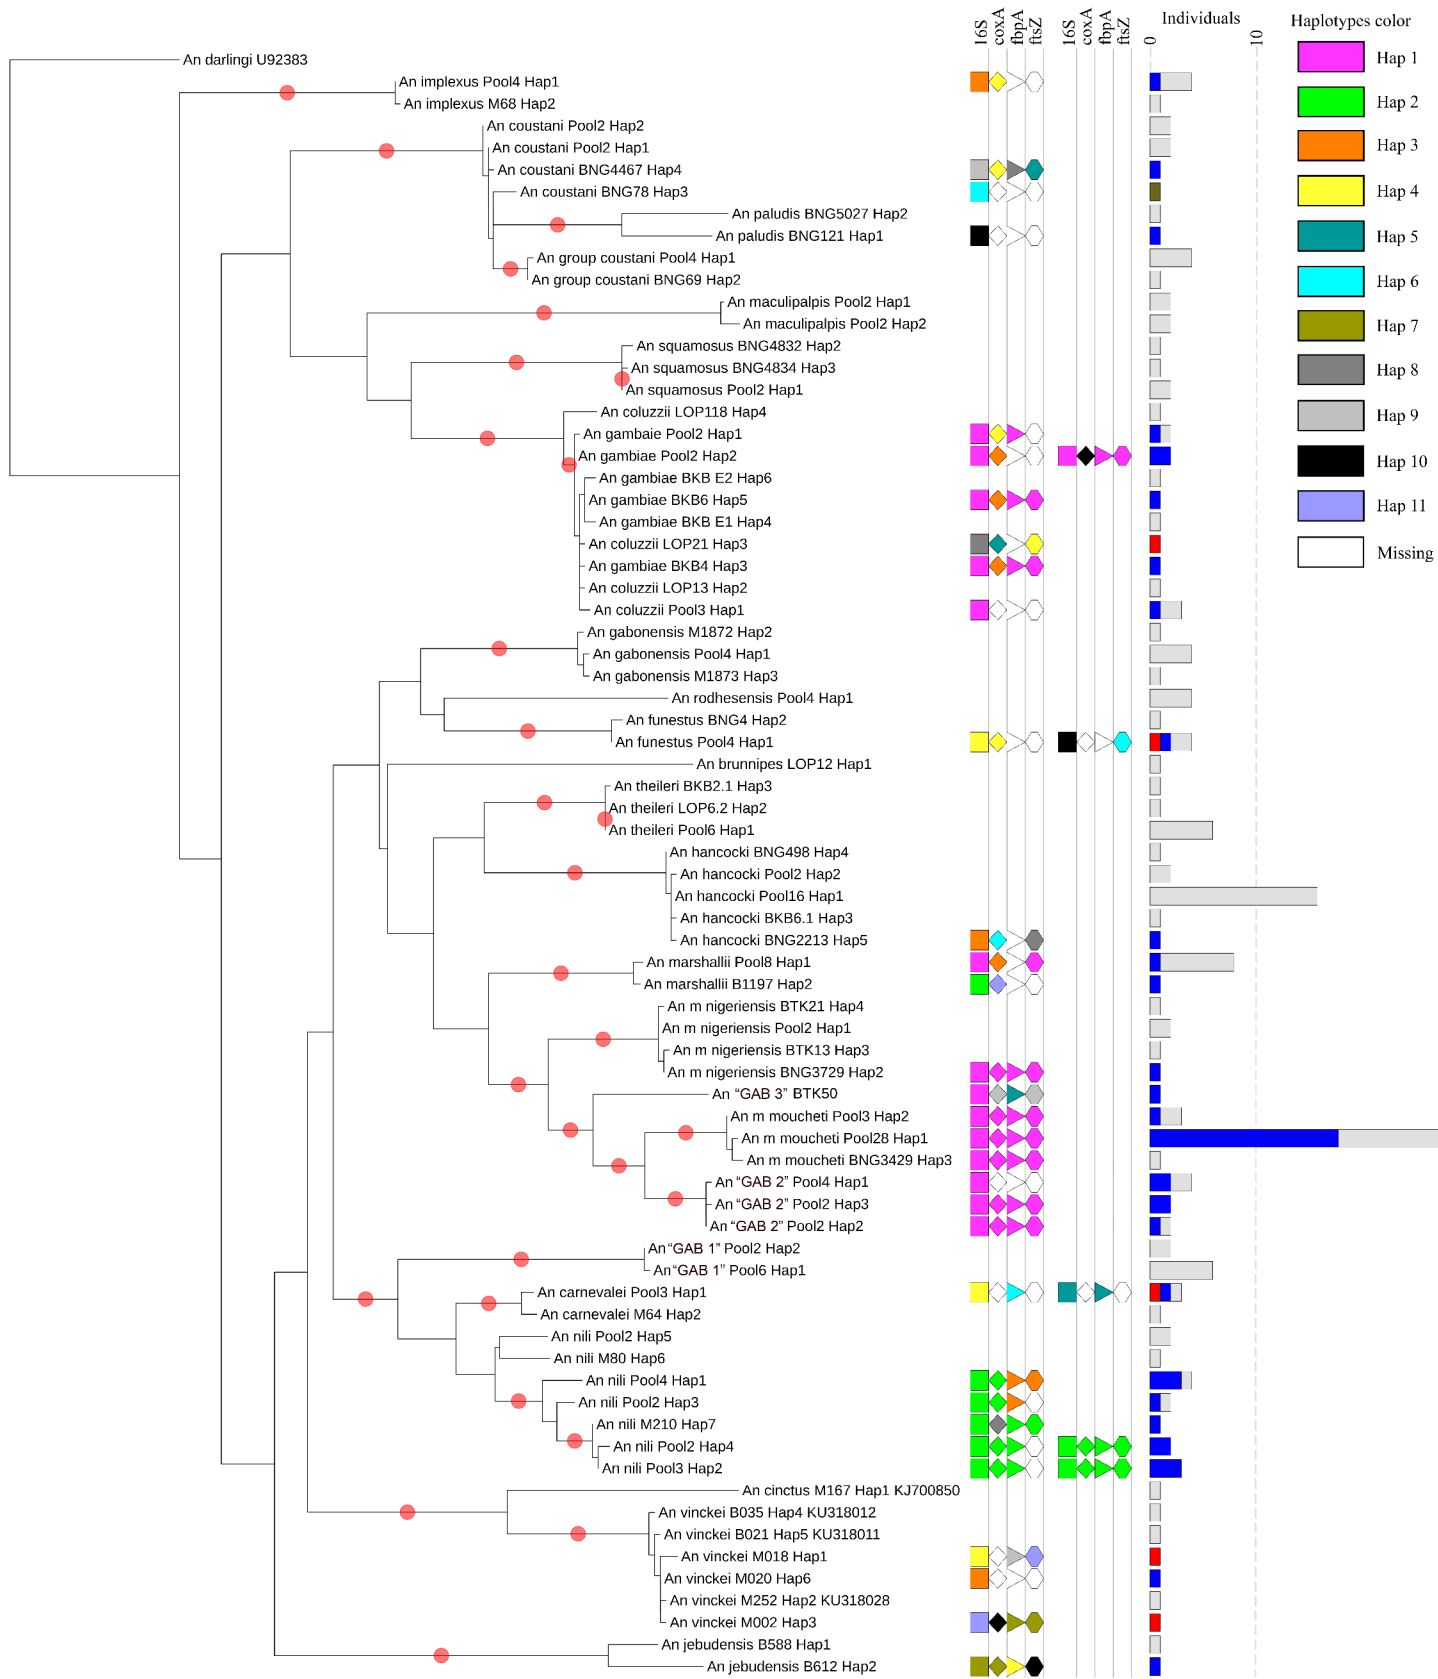

Tree scale: 0.01 —
